# Supplementary material for: The band structure and optical absorption of hematite (α-Fe2O3): a first-principles GW-BSE study
Source: Royal Society of Chemistry journal article supplement (doi:10.1039/c8cp07132b), 2019-01-01
Supplement: c8cp07132b1.pdf [file c8cp07132b1.pdf]

**1) Input file of a DFT calculation with PBE0(X=1/7), performed with pw.x (Quantum Espresso version 6.3)**

```
&control
  calculation='scf'
  restart_mode='from_scratch',
  prefix='fe',
  pseudo_dir = './'
  outdir='./',
  wf_collect=.true.
  verbosity = 'high'
/
&system
 ibrav = 5,
  celldm(1) = 10.255, celldm(4)=.561146108
  nat = 10,
  ntyp = 3,
  ecutwfc = 60
  ecutfock = 60
  nspin=2,
  nbnd=300,
  starting_magnetization(1)=0.5,
  starting_magnetization(2)=-0.5,
  occupations='smearing', degauss=0.001,
  force_symmorphic=.true.
  input_dft='pbe0', nqx1 = 2, nqx2 = 2, nqx3 = 2,
  exx_fraction=0.1429
  x_gamma_extrapolation = .true.
  exxdiv_treatment='gygi-baldereschi'
  nosym=.true.
&ions
/
&cell
/
ATOMIC_SPECIES
Au 55.85 Fe_ONCV_PBE-1.0_noghost.upf
Ag 55.85 Fe_ONCV_PBE-1.0_noghost.upf
O 15.999 08_O.oncvpsp.upf
ATOMIC_POSITIONS (crystal)
Ag 0.353421986 0.353421986 0.353421986
Au 0.146577999 0.146577999 0.146577999
Ag 0.646578014 0.646578014 0.646578014
Au 0.853421986 0.853421986 0.853421986
O 0.946735978 0.553264022 0.250000000
O 0.553264022 0.250000000 0.946735978
O 0.750000000 0.053264000 0.446736008
O 0.446736008 0.750000000 0.053264000
O 0.053264000 0.446736008 0.750000000
O 0.250000000 0.946735978 0.553264022
K_POINTS automatic
4 4 4 0 0 0
```

**2) Input file of a GW calculation performed with epsilon.cplx.x (BerkeleyGW version 1.2)**

```
epsilon_cutoff 40.0
```

number\_bands 300

begin qpoints

|             |             |              |     |   |
|-------------|-------------|--------------|-----|---|
| 0.000500000 | 0.000250000 | -0.000250000 | 1.0 | 1 |
| 0.000000000 | 0.000000000 | 0.250000000  | 1.0 | 0 |
| 0.000000000 | 0.000000000 | 0.500000000  | 1.0 | 0 |
| 0.000000000 | 0.000000000 | 0.750000000  | 1.0 | 0 |
| 0.000000000 | 0.250000000 | 0.000000000  | 1.0 | 0 |
| 0.000000000 | 0.250000000 | 0.250000000  | 1.0 | 0 |
| 0.000000000 | 0.250000000 | 0.500000000  | 1.0 | 0 |
| 0.000000000 | 0.250000000 | 0.750000000  | 1.0 | 0 |
| 0.000000000 | 0.500000000 | 0.000000000  | 1.0 | 0 |
| 0.000000000 | 0.500000000 | 0.250000000  | 1.0 | 0 |
| 0.000000000 | 0.500000000 | 0.500000000  | 1.0 | 0 |
| 0.000000000 | 0.500000000 | 0.750000000  | 1.0 | 0 |
| 0.000000000 | 0.750000000 | 0.000000000  | 1.0 | 0 |
| 0.000000000 | 0.750000000 | 0.250000000  | 1.0 | 0 |
| 0.000000000 | 0.750000000 | 0.500000000  | 1.0 | 0 |
| 0.000000000 | 0.750000000 | 0.750000000  | 1.0 | 0 |
| 0.250000000 | 0.000000000 | 0.000000000  | 1.0 | 0 |
| 0.250000000 | 0.000000000 | 0.250000000  | 1.0 | 0 |
| 0.250000000 | 0.000000000 | 0.500000000  | 1.0 | 0 |
| 0.250000000 | 0.000000000 | 0.750000000  | 1.0 | 0 |
| 0.250000000 | 0.250000000 | 0.000000000  | 1.0 | 0 |
| 0.250000000 | 0.250000000 | 0.250000000  | 1.0 | 0 |
| 0.250000000 | 0.250000000 | 0.500000000  | 1.0 | 0 |
| 0.250000000 | 0.250000000 | 0.750000000  | 1.0 | 0 |
| 0.250000000 | 0.500000000 | 0.000000000  | 1.0 | 0 |
| 0.250000000 | 0.500000000 | 0.250000000  | 1.0 | 0 |
| 0.250000000 | 0.500000000 | 0.500000000  | 1.0 | 0 |
| 0.250000000 | 0.500000000 | 0.750000000  | 1.0 | 0 |
| 0.250000000 | 0.750000000 | 0.000000000  | 1.0 | 0 |
| 0.250000000 | 0.750000000 | 0.250000000  | 1.0 | 0 |
| 0.250000000 | 0.750000000 | 0.500000000  | 1.0 | 0 |
| 0.250000000 | 0.750000000 | 0.750000000  | 1.0 | 0 |
| 0.500000000 | 0.000000000 | 0.000000000  | 1.0 | 0 |
| 0.500000000 | 0.000000000 | 0.250000000  | 1.0 | 0 |
| 0.500000000 | 0.000000000 | 0.500000000  | 1.0 | 0 |
| 0.500000000 | 0.000000000 | 0.750000000  | 1.0 | 0 |
| 0.500000000 | 0.250000000 | 0.000000000  | 1.0 | 0 |
| 0.500000000 | 0.250000000 | 0.250000000  | 1.0 | 0 |
| 0.500000000 | 0.250000000 | 0.500000000  | 1.0 | 0 |
| 0.500000000 | 0.250000000 | 0.750000000  | 1.0 | 0 |
| 0.500000000 | 0.500000000 | 0.000000000  | 1.0 | 0 |
| 0.500000000 | 0.500000000 | 0.250000000  | 1.0 | 0 |
| 0.500000000 | 0.500000000 | 0.500000000  | 1.0 | 0 |
| 0.500000000 | 0.500000000 | 0.750000000  | 1.0 | 0 |
| 0.500000000 | 0.750000000 | 0.000000000  | 1.0 | 0 |
| 0.500000000 | 0.750000000 | 0.250000000  | 1.0 | 0 |
| 0.500000000 | 0.750000000 | 0.500000000  | 1.0 | 0 |
| 0.500000000 | 0.750000000 | 0.750000000  | 1.0 | 0 |
| 0.750000000 | 0.000000000 | 0.000000000  | 1.0 | 0 |
| 0.750000000 | 0.000000000 | 0.250000000  | 1.0 | 0 |
| 0.750000000 | 0.000000000 | 0.500000000  | 1.0 | 0 |
| 0.750000000 | 0.000000000 | 0.250000000  | 1.0 | 0 |
| 0.750000000 | 0.000000000 | 0.500000000  | 1.0 | 0 |

```

0.750000000 0.000000000 0.750000000 1.0 0
0.750000000 0.250000000 0.000000000 1.0 0
0.750000000 0.250000000 0.250000000 1.0 0
0.750000000 0.250000000 0.500000000 1.0 0
0.750000000 0.250000000 0.750000000 1.0 0
0.750000000 0.500000000 0.000000000 1.0 0
0.750000000 0.500000000 0.250000000 1.0 0
0.750000000 0.500000000 0.500000000 1.0 0
0.750000000 0.500000000 0.750000000 1.0 0
0.750000000 0.750000000 0.000000000 1.0 0
0.750000000 0.750000000 0.250000000 1.0 0
0.750000000 0.750000000 0.500000000 1.0 0
0.750000000 0.750000000 0.750000000 1.0 0
end

```

### 3) Input file of a GW calculation performed with sigma.cplx.x (BerkeleyGW version 1.2)

```

number_bands 300

band_index_min 49
band_index_max 53

screening_semiconductor
exact_static_ch 1

dont_use_vxcdat

spin_index_min 1

begin kpoints
0.000000000 0.000000000 0.000000000 1.0
0.000000000 0.000000000 0.250000000 1.0
0.000000000 0.000000000 -0.500000000 1.0
0.000000000 0.250000000 0.250000000 1.0
0.000000000 0.250000000 -0.500000000 1.0
0.000000000 0.250000000 -0.250000000 1.0
0.000000000 -0.500000000 0.250000000 1.0
0.000000000 -0.500000000 -0.500000000 1.0
0.250000000 0.250000000 0.250000000 1.0
0.250000000 0.250000000 -0.500000000 1.0
0.250000000 0.250000000 -0.250000000 1.0
0.250000000 -0.500000000 -0.500000000 1.0
0.250000000 -0.500000000 -0.250000000 1.0
-0.500000000 -0.500000000 -0.500000000 1.0
end

```

### 4) Input file of a BSE calculation performed with kernel.cplx.x (BerkeleyGW version 1.2)

```

number_val_bands 24
number_cond_bands 14

use_symmetries_coarse_grid
screening_semiconductor

```

### 5) Input file of a BSE calculation performed with absorption.cplx.x (BerkeleyGW version 1.2)

number\_val\_bands\_coarse 24  
number\_cond\_bands\_coarse 14  
number\_val\_bands\_fine 17  
number\_cond\_bands\_fine 12

degeneracy\_check\_override

use\_symmetries\_coarse\_grid  
no\_symmetries\_fine\_grid  
no\_symmetries\_shifted\_grid

screening\_semiconductor

use\_velocity

haydock  
number\_iterations 500

gaussian\_broadening  
energy\_resolution 0.15
