# Supplementary material for: The band structure and optical absorption of hematite (α-Fe2O3): a first-principles GW-BSE study
Source: Royal Society of Chemistry journal article supplement (doi:10.1039/c8cp07132b), 2019-01-01
Supplement: c8cp07132b2.pdf [file c8cp07132b2.pdf]

## Supplementary Information

# The band structure and optical absorption of hematite ( $\alpha\text{-Fe}_2\text{O}_3$ ): a first-principles GW-BSE study

Simone Piccinin\*

*CNR-IOM DEMOCRITOS, c/o SISSA, Via Bonomea 265, 34136 Trieste, Italy*

E-mail: [piccinin@iom.cnr.it](mailto:piccinin@iom.cnr.it)

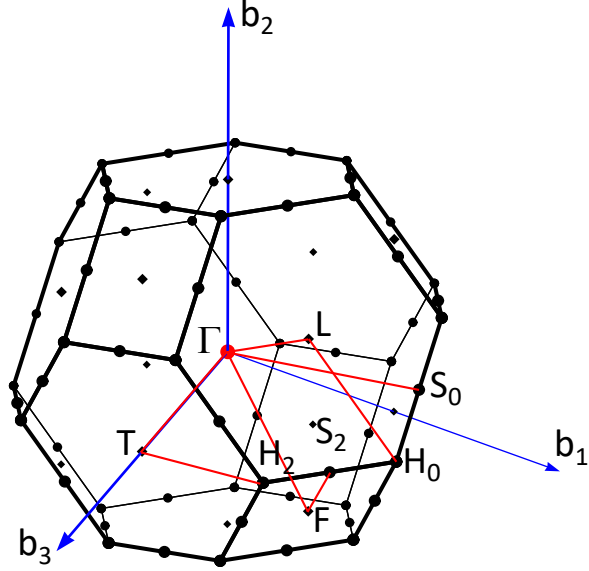

Figure S1: The Brillouin zone of the 10-atom rhombohedral unit cell of hematite and the path (red line) along which the bandstructure is computed.

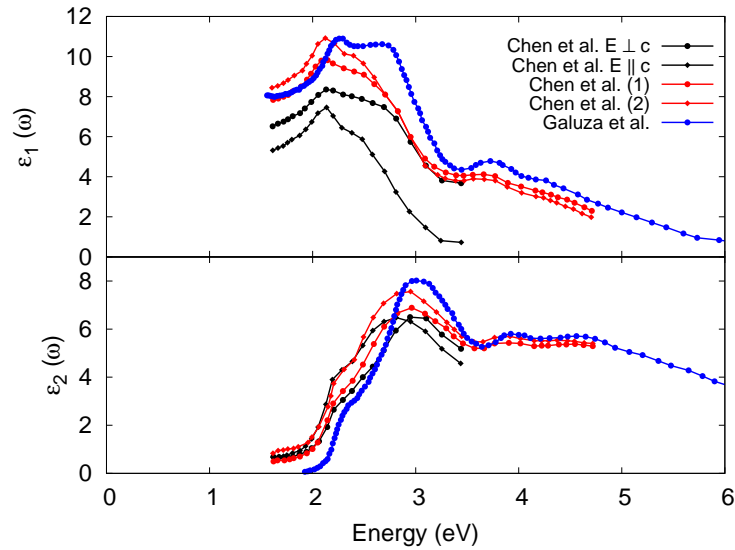

Figure S2: Experimental measurements of the real ( $\epsilon_1$ ) and imaginary ( $\epsilon_2$ ) parts of the dielectric function. The data are extracted from the graphs in the works of Chen *et al.*<sup>1</sup> and Galuza *et al.*<sup>2</sup> The labels (1) and (2) refer to two different polycrystalline samples obtained through sintering at different temperatures.

Fig. S1 displays the Brillouin zone of bulk hematite and the path employed to plot the the bandstructure. In Fig. S2 we report experimental measurements of the real ( $\epsilon_1$ ) and imaginary ( $\epsilon_2$ ) parts of the dielectric function obtained by Chen *et al.*<sup>1</sup> and Galuza *et al.*<sup>2</sup>

## Convergence tests

Table 1: Convergence of the  $G_0W_0@PBE$  quasiparticle gap at Gamma ( $\text{Gap}(\Gamma)$ ) as a function of the cutoff for the dielectric matrix ( $E_{cut}^x$ ), the number of bands considered in the sum over empty states in the calculation of the dielectric matrix ( $N_{bands}^x$ ) and of the self energy ( $N_{bands}^\Sigma$ ).

| $E_{cut}^x$ (Ry) | $N_{bands}^x$ | $N_{bands}^\Sigma$ | $\text{Gap}(\Gamma)$ |
|------------------|---------------|--------------------|----------------------|
| 50               | 1994          | 100                | 2.019                |
| 50               | 1994          | 202                | 2.065                |
| 50               | 1994          | 300                | 2.063                |
| 50               | 1994          | 694                | 2.056                |
| 50               | 1994          | 996                | 2.062                |
| 50               | 1994          | 1500               | 2.074                |
| 50               | 1994          | 1994               | 2.088                |
| 50               | 100           | 1994               | 2.200                |
| 50               | 202           | 1994               | 2.170                |
| 50               | 300           | 1994               | 2.162                |
| 50               | 694           | 1994               | 2.132                |
| 50               | 996           | 1994               | 2.116                |
| 50               | 1500          | 1994               | 2.100                |
| 50               | 1994          | 1994               | 2.088                |
| 10               | 1994          | 1994               | 2.361                |
| 20               | 1994          | 1994               | 2.266                |
| 30               | 1994          | 1994               | 2.175                |
| 40               | 1994          | 1994               | 2.119                |
| 50               | 1994          | 1994               | 2.088                |
| 40               | 300           | 300                | 2.155                |

In Table 1 we show the converge tests on the quasiparticle gap obtained with the  $G_0W_0@PBE$  approach. To accelerate the convergence of the sum over empty states in the calculation of the Coulomb-hole self-energy term, we exploit the static remainder method.<sup>3</sup>

In Fig. S3 we show the convergence of dielectric function with k-point sampling and with the number of bands employed in the sum over empty states.

In Fig. S4 we show the convergence of the dielectric function with respect to the cutoff of the wavefunction.

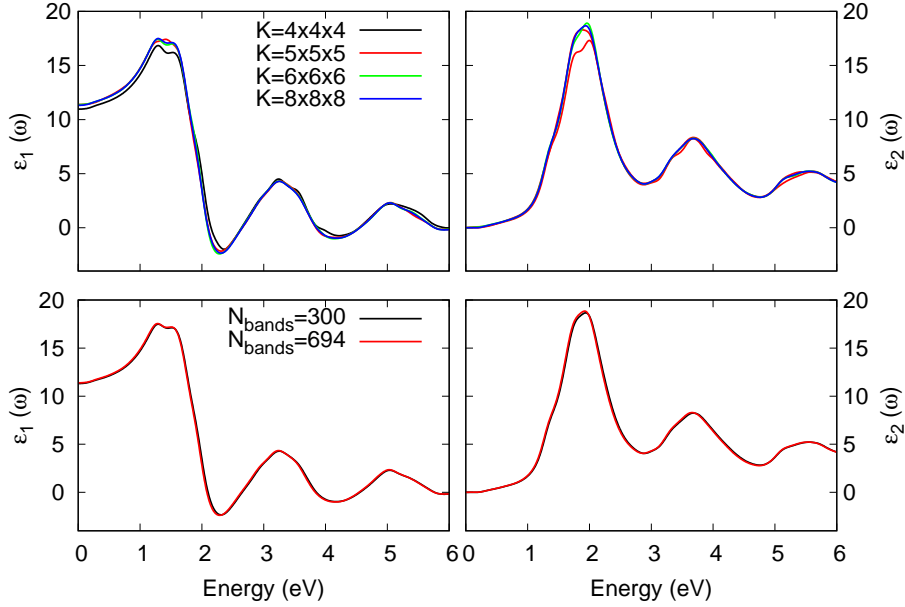

Figure S3: Convergence of the real and imaginary part of the dielectric function with k-point sampling (top panels) and number of bands (bottom panels). The SCF calculation is performed with the PBE functional. The SCF,  $G_0W_0$  and kernel calculations are performed on a  $4 \times 4 \times 4$  grid. In the top panels, the kernel has then been interpolated on finer k-point grids where the Bethe-Salpeter equation is solved, while using  $N_{\text{bands}}^\epsilon = N_{\text{bands}}^\Sigma = 300$ . In the bottom panels the kernel is interpolated on a  $8 \times 8 \times 8$  grid while testing for convergence with respect to the number of bands.

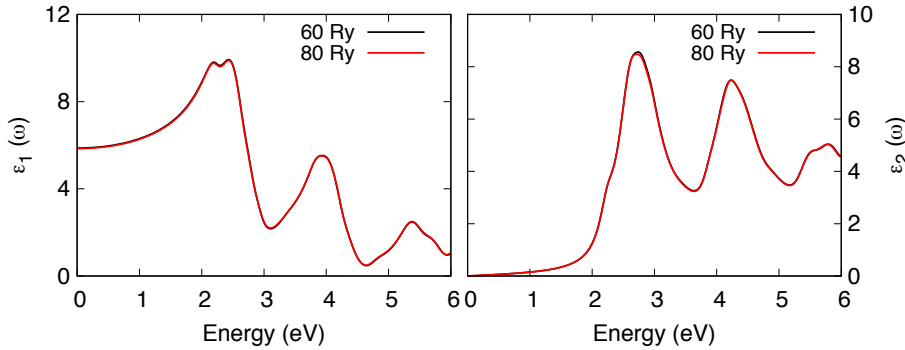

Figure S4: Convergence of the real and imaginary part of the dielectric function with the cutoff of the wavefunction. The BSE calculation has been performed starting from a PBE0( $\alpha=1/8$ ) calculation with a  $4 \times 4 \times 4$  grid k-point grid. The kernel has then been interpolated on finer  $5 \times 5 \times 5$  k-point grid.

## References

- (1) Chen, C. T.; Cahan, B. D. *J. Opt. Soc. Am.* **1981**, *71*, 932–934.

- (2) Galuza, A. I.; Eremenko, V. V.; Kirichenko, A. I. *Sov. Phys. Solid State* **1979**, *21*, 654.
- (3) Deslippe, J.; Samsonidze, G.; Jain, M.; Cohen, M. L.; Louie, S. G. *Phys. Rev. B* **2013**, *87*, 165124.
